# Supplementary material for: Tree branch-shaped cupric oxide for highly effective photoelectrochemical water reduction
Source: Royal Society of Chemistry journal article supplement (doi:10.1039/c5nr00208g), 2015-01-01
Supplement: c5nr00208g1.pdf [file c5nr00208g1.pdf]

Electronic Supplementary Information (ESI)

## Tree Branch-Shaped Cupric Oxide for Highly Effective Photoelectrochemical Water Reduction

Youn Jeong Jang<sup>a,†</sup>, Ji-Wook Jang<sup>b,†</sup>, Sun Hee Choi<sup>c</sup>, Jae Young Kim<sup>d</sup>, Ju Hun Kim<sup>a</sup>, Duck Hyun Youn<sup>d</sup>, Won Yong Kim<sup>a</sup>, Suenghoon Han<sup>a</sup> and Jae Sung Lee<sup>d</sup>

<sup>a</sup> Department of Chemical Engineering, Pohang University of Science and Technology (POSTECH), San 31 Hyoja-Dong, Pohang, 790-784 South Korea

<sup>b</sup> Department of Chemistry, Merkert Chemistry Center, Boston College 2609 Beacon Street, Chestnut Hill, MA, 20467 USA

<sup>c</sup> Pohang Accelerator Laboratory, POSTECH, Pohang 790-784 South Korea

<sup>d</sup> Department of Energy and Chemical Engineering, Ulsan National Institute of Science and Technology (UNIST), 50 UNIST-gil, Ulsan, 689-798 South Korea.

† These authors contributed equally to this work.

\* Corresponding author: E-mail: jlee1234@unist.ac.kr (J.S.L.)

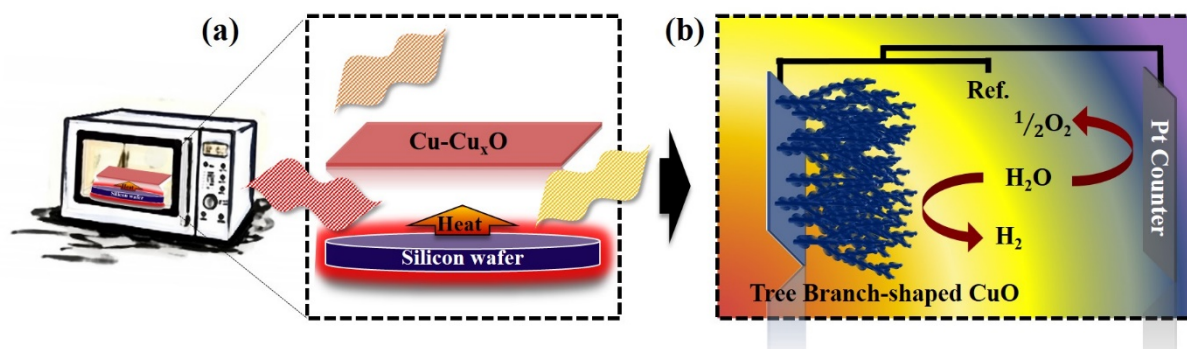

**Figure S1.** Schematics for hybrid microwave annealing process with a silicon susceptor (a) and photoelectrochemical (PEC) water splitting process using the tree branch-shaped CuO photocathode (b).

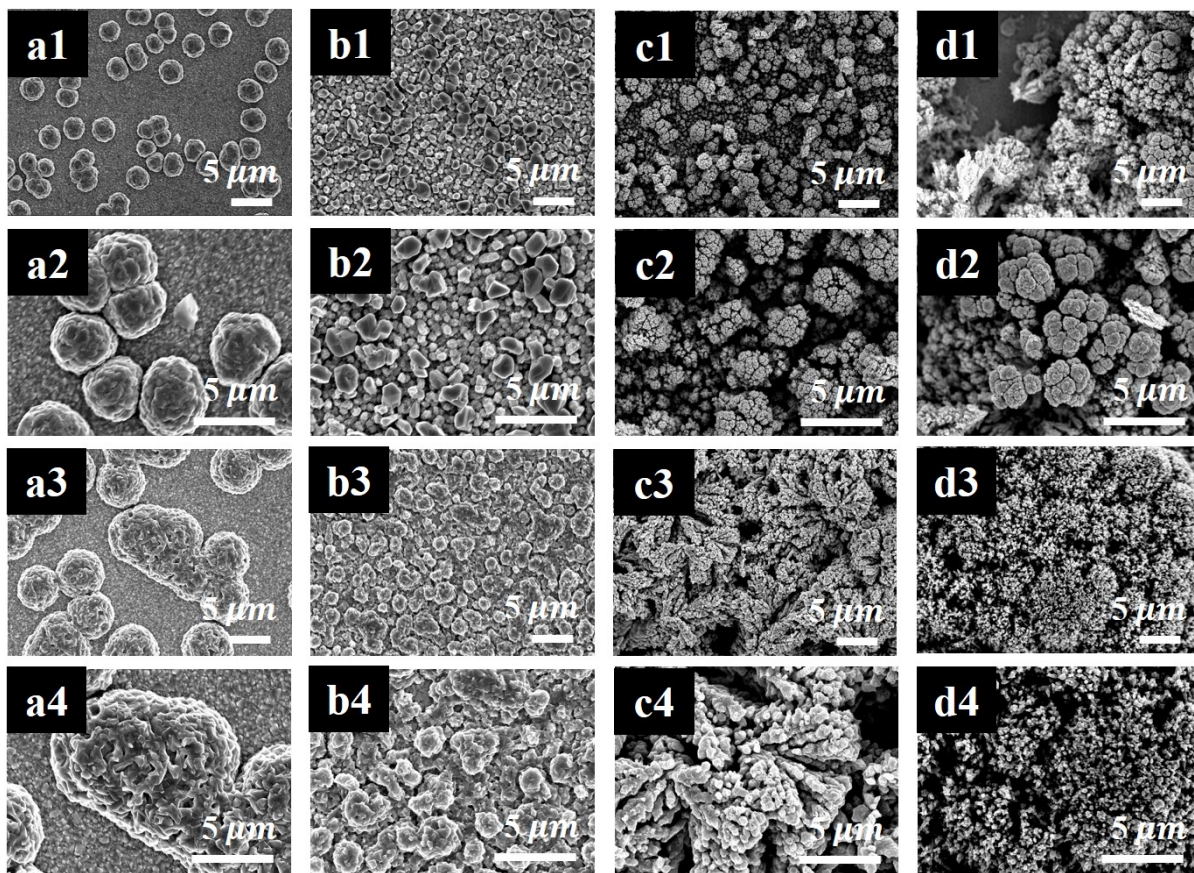

**Figure S2.** The SEM images of the as electrodeposited Cu-Cu oxide at various applied voltage ; (a1-a2) 1 Vdc, (b1-b2) 3 Vdc, (c1-c2) 5 Vdc, and (d1-d2) 10 Vdc, and the HMA treated CuO after electrodeposited at various applied voltage; (a3-a4) 1 Vdc, (b3-b4) 3 Vdc, (c3-c4) 5 Vdc, and (d3-d4) 10 Vdc,

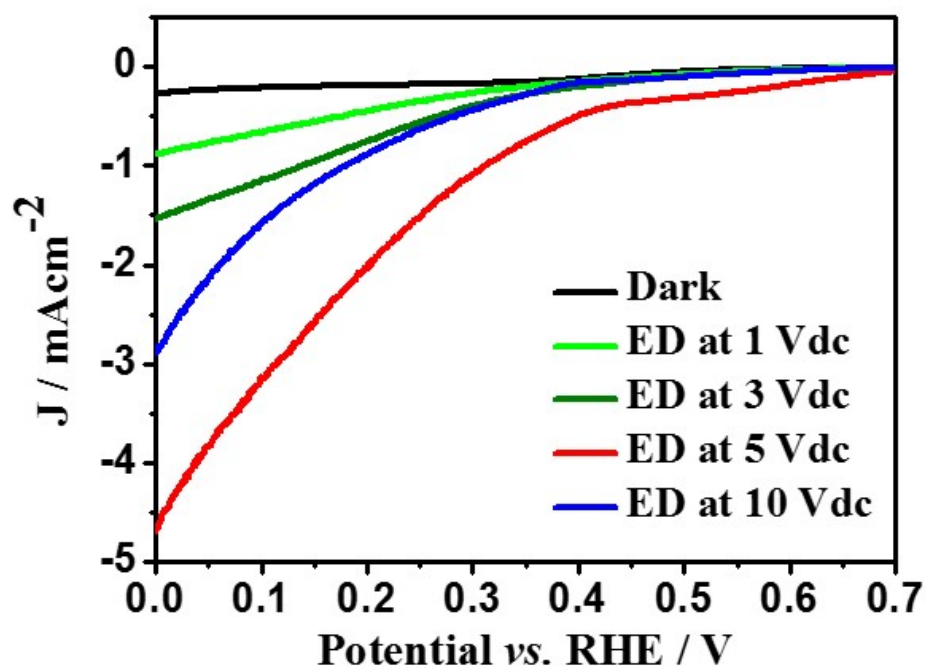

**Figure S3.** Photocurrent density ( $J$ ) and applied potential (V) for HMA CuO electrodeposited at various voltage; 1, 3, 5 and 10 Vdc, under simulated 1 Sun illumination in the 0.5 M  $\text{Na}_2\text{SO}_4$

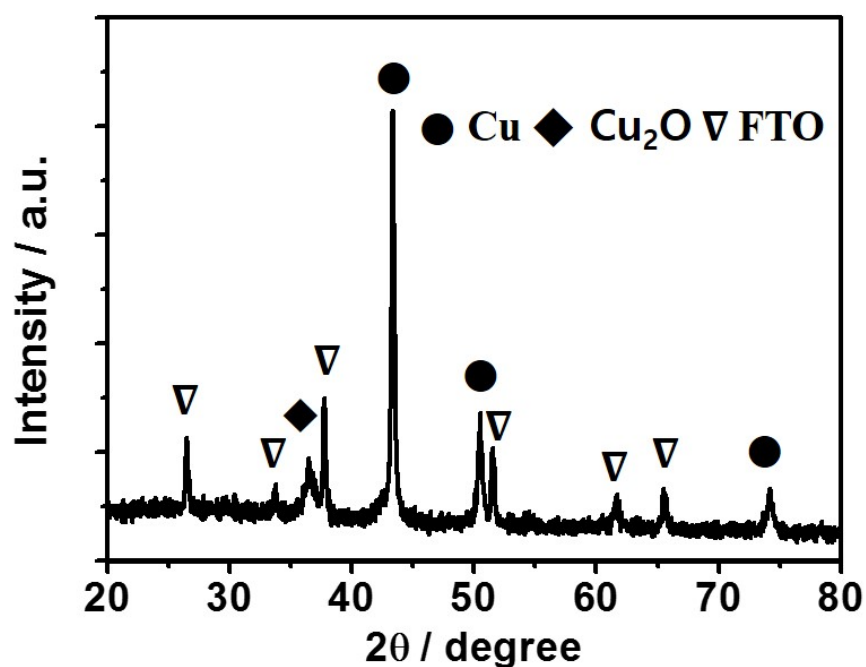

**Figure S4.** X-ray diffraction (XRD) pattern of conventional microwave-annealed Cu- $\text{Cu}_x\text{O}$  oxide film on FTO (MA  $\text{Cu}_x\text{O}$ ).

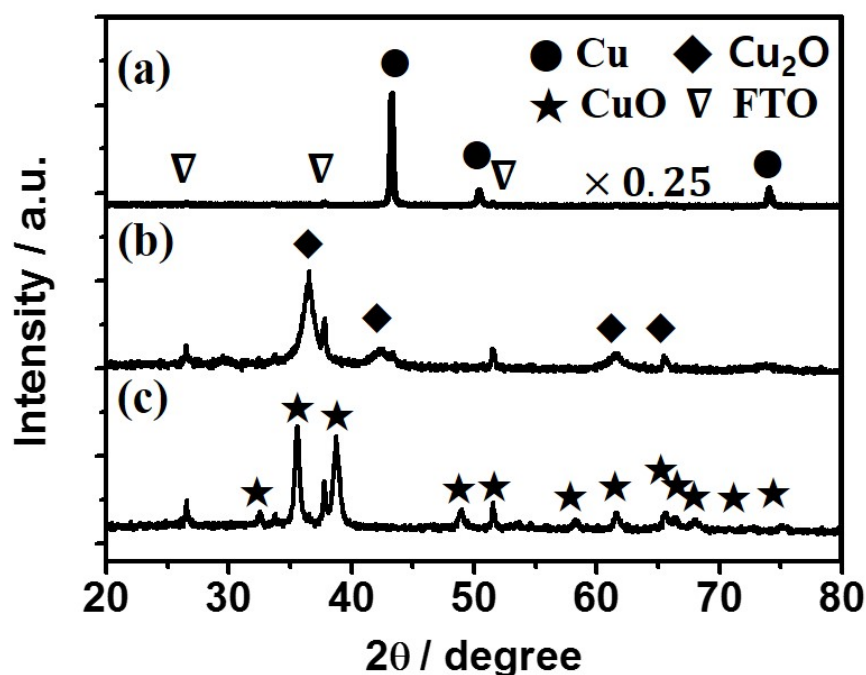

**Figure S5.** XRD patterns of (a) Cu FTO, (b) HMA-treated film with a graphite susceptor for 20s showing  $\text{Cu}_2\text{O}$  as the major phase, and (c) HMA-treated film with a graphite susceptor for 30s showing CuO as the major phase.

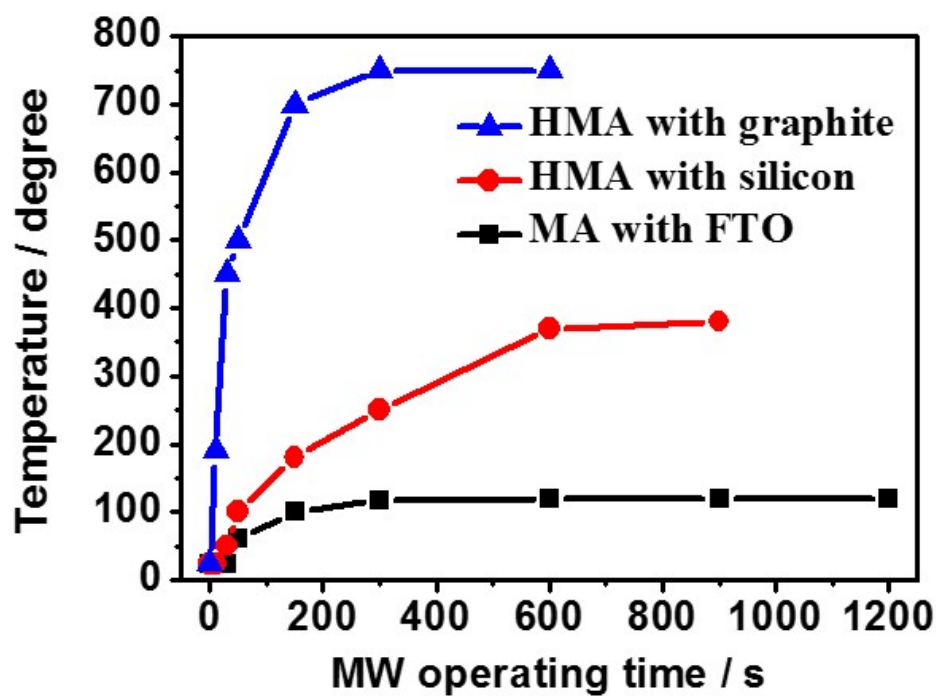

**Figure S6.** Temperature profiles of microwave (MW) operating time with FTO alone, HMA with a silicon susceptor and HMA with a graphite susceptor.

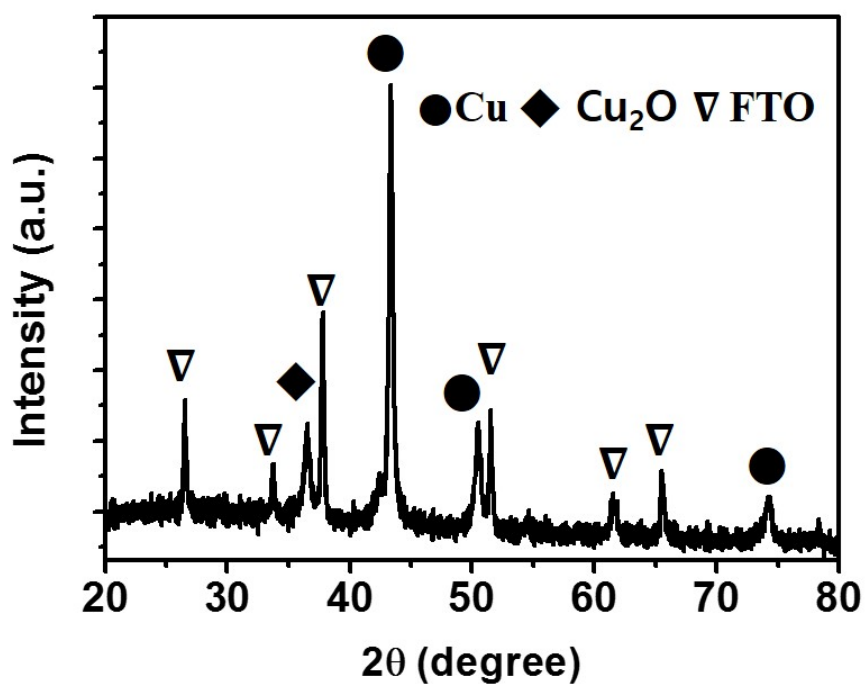

**Figure S7.** XRD pattern of Cu FTO film treated with HMA with a silicon susceptor for 10 min with a reduced power by 80%.

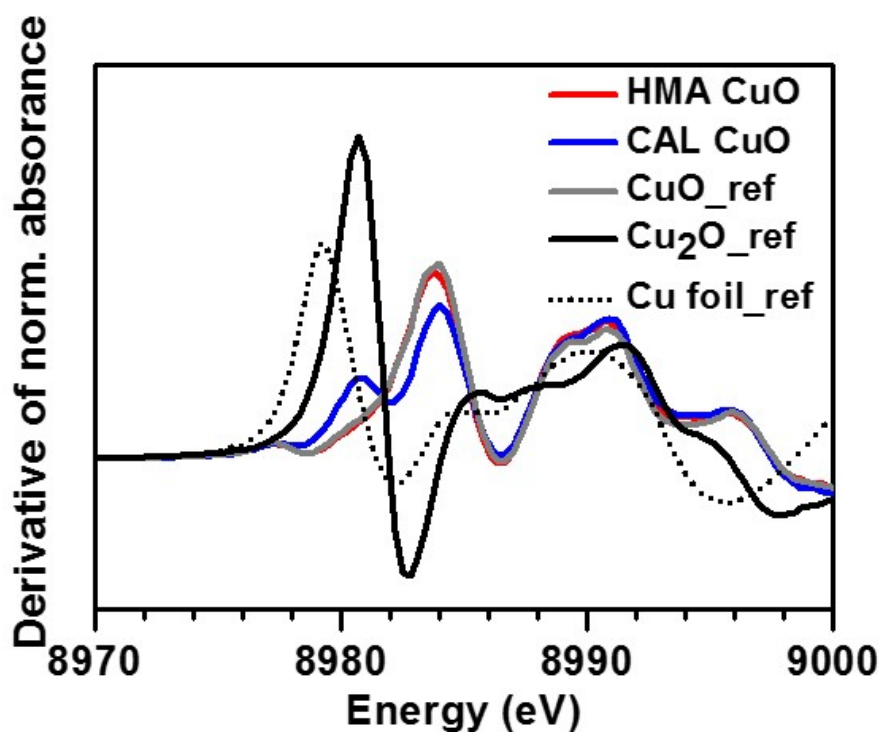

**Figure S8.** The derivatives of the normalized absorbance spectra of the photodeposited CuO films and reference materials.

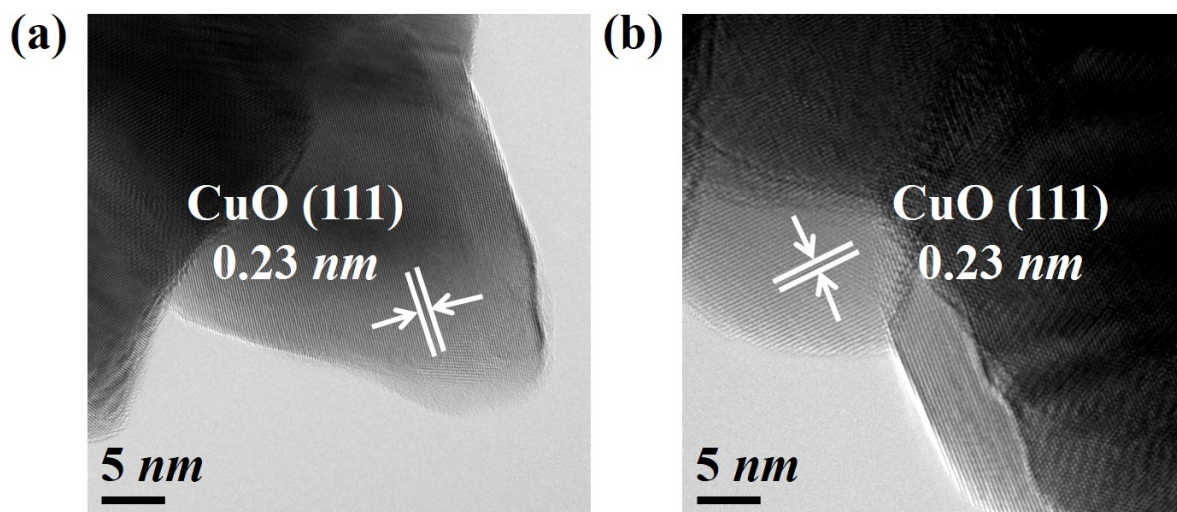

**Figure S9.** Transmission electron microscopy (TEM) images of (a) HMA CuO and (b) CAL CuO

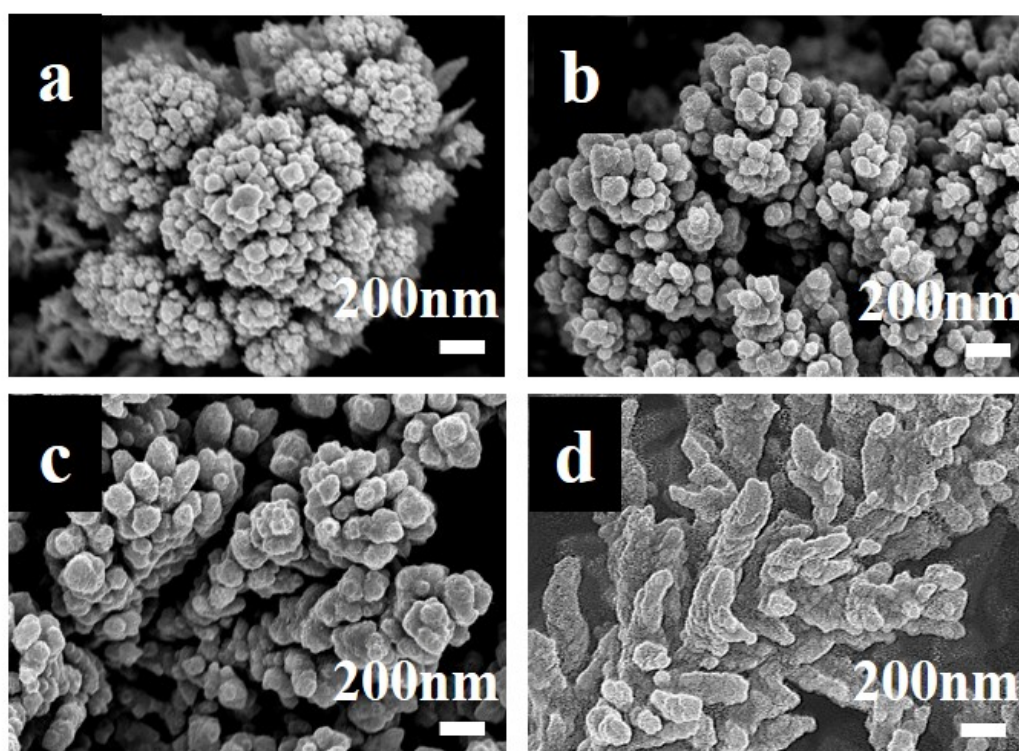

**Figure S10.** The SEM images of the as electrodeposited Cu-Cu oxide (a) and HMA treated CuO after 30s (b), 3min (c) and 10 min (d).

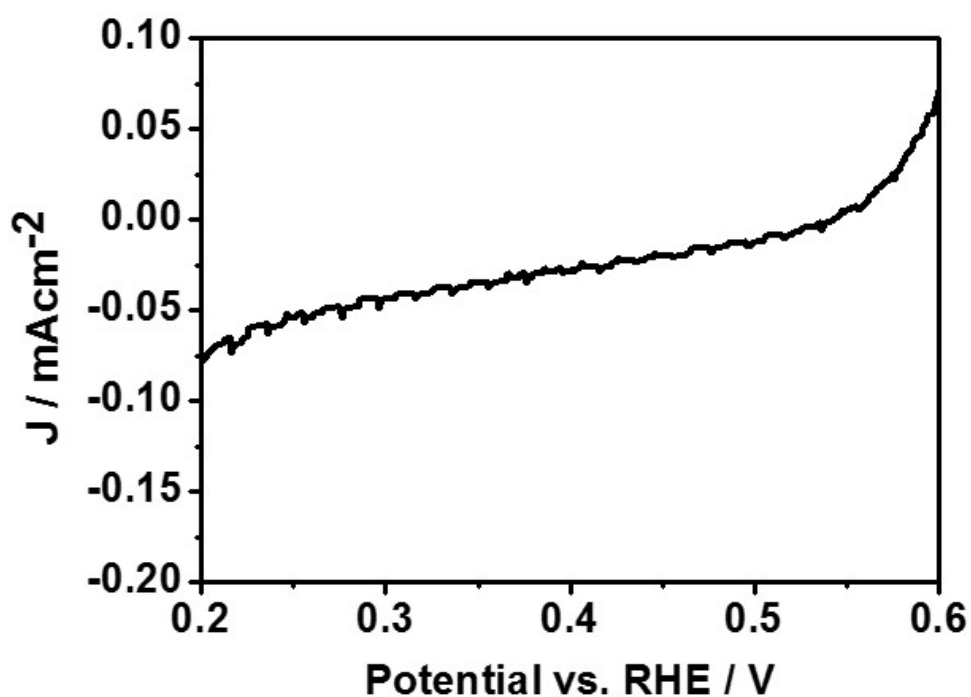

**Figure S11.** Photocurrent density (J) – applied potential (V) curve of as electrodeposited Cu FTO.

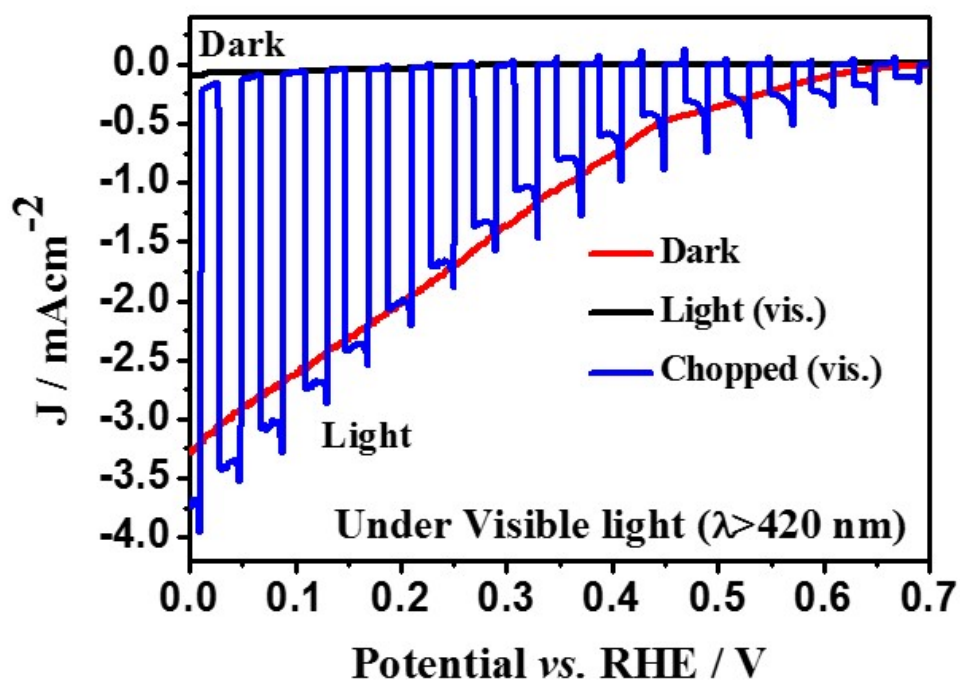

**Figure S12.** Photocurrent density (J) and applied potential (V) for HMA CuO under visibly light illumination ( $\lambda > 420$  nm) in the 0.5 M  $\text{Na}_2\text{SO}_4$ .

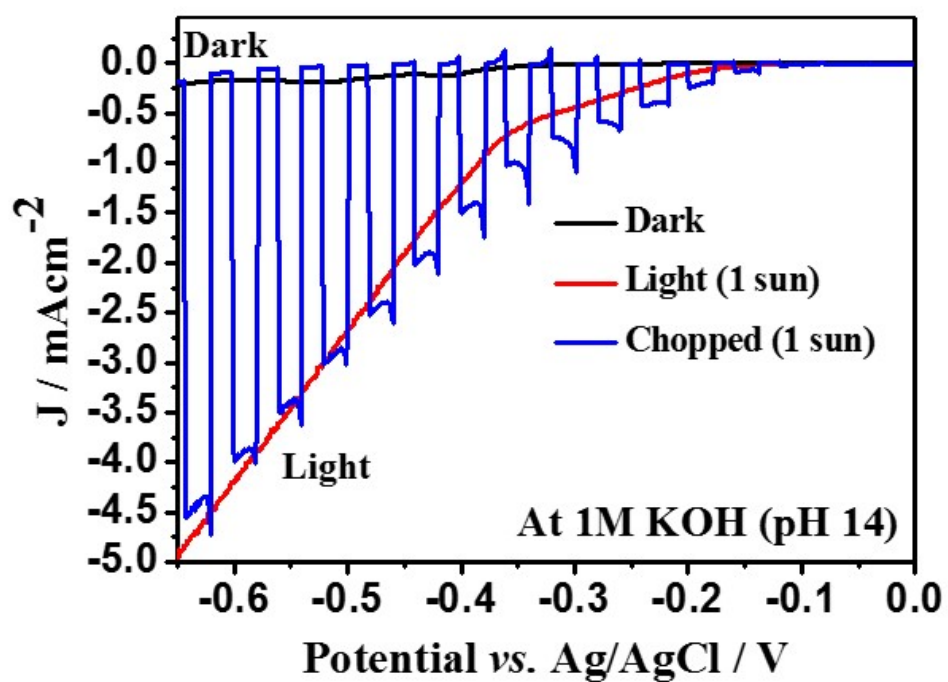

**Figure S13.** Photocurrent density ( $J$ ) and applied potential ( $V$ ) for HMA CuO under simulated 1 Sun illumination in the 1M KOH.

**Table S1.** Summary of PEC water splitting performances with copper oxide based photocathodes before post surface modification treatment under AM 1.5 light illumination

| Electrode                | Fabrication Method                                        | Electrolyte                       | Photocurrent density<br>[ mAcm <sup>-2</sup> ]       | Ref.                 |
|--------------------------|-----------------------------------------------------------|-----------------------------------|------------------------------------------------------|----------------------|
| CuO                      | Spin coating and Sintering                                | KOH                               | -1.2<br>(0.55 V <i>vs.</i> Ag/AgCl )                 | 3                    |
| Cu/Cu <sub>2</sub> O/CuO | Thermal Oxidation                                         | Na <sub>2</sub> SO <sub>4</sub>   | -1.8<br>(0 V <i>vs.</i> RHE)                         | 7                    |
| Cu/Cu <sub>2</sub> O/CuO | Anodization and Thermal Oxidation                         | K <sub>2</sub> SO <sub>4</sub>    | -0.36<br>(0.36 V <i>vs.</i> Ag/AgCl)<br>300W Xe lamp | 12                   |
| Cu <sub>2</sub> O/CuO    | Electrodeposition<br>Anodization and<br>Thermal Oxidation | , Na <sub>2</sub> SO <sub>4</sub> | -1.54<br>(0 V <i>vs.</i> RHE)                        | 21                   |
| Cu <sub>2</sub> O        | Electrodeposition                                         | Na <sub>2</sub> SO <sub>4</sub>   | -2.4<br>(0.25 V <i>vs.</i> RHE)                      | 22                   |
| CuO                      | Sputter                                                   | KOH                               | -3.15<br>(0.55 V <i>vs.</i> Ag/AgCl )                | 23                   |
| CuO                      | Electrodeposition and<br>Hybrid Microwave<br>Annealing    | Na <sub>2</sub> SO <sub>4</sub>   | -4.4<br>(0 V <i>vs.</i> RHE)                         | <i>Present study</i> |
| CuO                      | Electrodeposition and<br>Hybrid Microwave<br>Annealing    | KOH                               | -3.62<br>(0.55 V <i>vs.</i> Ag/AgCl )                | <i>Present study</i> |

**Table S2.** The results of EIS fitting into equivalent circuit model for HMA and CAL CuO

| Element        | Rs    | R1    | CPE 1-T                | R2   | CPE 2-T                |
|----------------|-------|-------|------------------------|------|------------------------|
| <b>HMA CuO</b> | 15.55 | 144.3 | $1.818 \times 10^{-4}$ | 592  | $7.625 \times 10^{-4}$ |
| <b>CAL CuO</b> | 20.72 | 535.1 | $1.314 \times 10^{-4}$ | 2181 | $3.163 \times 10^{-4}$ |
